# Supplementary material for: Phylogeny and Flow Cytometry of the Genus Kalidium Moq. (Amaranthaceae s.l.) in Kazakhstan
Source: MDPI journal article supplement (doi:10.3390/plants12142619), 2023-07-11
Supplement: s1 [file s1]

## Supplements

### Supplement A

Table -Origin, source, and GenBank accession numbers of *Kalidium* sequences made for phylogenetic analyses

| Accession | Name                           | Coordinates                | Voucher     | rITS     | trnQ-rps16 | rpl32-trnL |
|-----------|--------------------------------|----------------------------|-------------|----------|------------|------------|
| B01       | <i>Kalidium caspicum</i>       | 44.106944 N<br>67.056389 E | AA: 0001993 | OQ061486 | OQ077105   | OQ077120   |
| B03       | <i>Kalidium caspicum</i>       | 45.875278 N<br>62.139167 E | AA: 0001995 | OQ061487 | OQ077106   | OQ077121   |
| B04       | <i>Kalidium caspicum</i>       | 44.1775 N<br>78.812778 E   | AA: 0001994 | OQ061488 | OQ077107   | OQ077122   |
| B07       | <i>Kalidium caspicum</i>       | 45.848274 N<br>62.230855 E | AA: 0001992 | OQ061489 | OQ077108   | OQ077123   |
| B08       | <i>Kalidium caspicum</i>       | 44.106111N<br>67.044444 E  | AA: 0001998 | OQ061490 | OQ077109   | OQ077124   |
| B09       | <i>Kalidium caspicum</i>       | 45.103361 N<br>64.531417 E | AA: 0002000 | OQ061491 | OQ077110   | OQ077125   |
| B10       | <i>Kalidium caspicum</i>       | 44.080028 N<br>64.701056 E | AA: 0002001 | OQ061492 | OQ077111   | OQ077126   |
| B10.2     | <i>Kalidium caspicum</i>       | 44.080028 N<br>64.701056 E | AA: 0002001 | OQ061493 | -          | -          |
| B11       | <i>Kalidium caspicum</i>       | 44.109917 N<br>67.056361 E | AA: 0001999 | OQ061494 | OQ077112   | OQ077127   |
| B11.2     | <i>Kalidium caspicum</i>       | 44.109917 N<br>67.056361 E | AA: 0001999 | OQ061495 | -          | -          |
| B12       | <i>Kalidium caspicum</i>       | 43.680278 N<br>80.073333 E | AA: 0002002 | OQ061496 | OQ077113   | OQ077128   |
| B12.2     | <i>Kalidium caspicum</i>       | 43.680278 N<br>80.073333 E | AA: 0002002 | OQ061497 | -          | -          |
| B14       | <i>Kalidium caspicum</i>       | 43.759444 N<br>80.228889 E | AA: 0002003 | OQ061498 | OQ077114   | OQ077129   |
| B14.2     | <i>Kalidium caspicum</i>       | 45.875278 N<br>62.139167 E | AA: 0002003 | OQ061499 | -          | -          |
| B14.3     | <i>Kalidium caspicum</i>       | 45.875278 N<br>62.139167 E | AA: 0002003 | OQ061500 | -          | -          |
| B02       | <i>Kalidium foliatum</i>       | 44.106944 N<br>67.056389 E | AA: 0001997 | OQ061481 | OQ077115   | OQ077130   |
| B05       | <i>Kalidium foliatum</i>       | 44.1775 N<br>78.812778 E   | AA: 0001996 | OQ061482 | OQ077116   | OQ077131   |
| B06       | <i>Kalidium foliatum</i>       | 45.848274 N<br>62.230855 E | AA: 0001991 | OQ061483 | OQ077117   | OQ077132   |
| B13       | <i>Kalidium foliatum</i>       | 43.680278 N<br>80.073333 E | AA: 0002004 | OQ061484 | OQ077118   | OQ077133   |
| B13.2     | <i>Kalidium foliatum</i>       | 43.680278 N<br>80.073333 E | AA: 0002004 | OQ061485 | -          | -          |
| B15       | <i>Kalidium schrenkianum</i>   | 43.759444 N<br>80.228889 E | AA: 0002005 | OQ061501 | OQ077119   | OQ077134   |
| B16       | <i>Halocnemum strobilaceum</i> | 43.796389 N<br>67.463611 E | AA: 0002038 | OQ062601 | OQ077135   | OQ077162   |

|     |                                 |                            |             |          |          |          |
|-----|---------------------------------|----------------------------|-------------|----------|----------|----------|
| B20 | <i>Halostachys belangeriana</i> | 44.106944 N<br>67.056389 E | AA: 0002031 | OQ062605 | OQ077138 | OQ077165 |
|-----|---------------------------------|----------------------------|-------------|----------|----------|----------|

## Supplement B

Table - Sample data from NCBI database (only ITS)

| Name                                                 | Locality                 | rITS               |
|------------------------------------------------------|--------------------------|--------------------|
| <i>Kalidium caspicum</i>                             | 44.215833 N 86.655278 E  | KX133017- KX133019 |
| <i>Kalidium caspicum</i>                             | 43.844444 N 90.624444 E  | KX133020- KX133022 |
| <i>Kalidium caspicum</i>                             | 43.772500 N 91.721667 E  | KX133023- KX133025 |
| <i>Kalidium caspicum</i>                             | 44.120556 N 87.714444 E  | KX133026- KX133028 |
|                                                      |                          |                    |
| <i>Kalidium cuspidatum</i>                           | 37.777672 N 95.292038 E  | DQ340148           |
| <i>Kalidium cuspidatum</i>                           | 42.547884 N 93.981696 E  | HM131637           |
| <i>Kalidium cuspidatum</i> var.<br><i>cuspidatum</i> | 36.708333 N 99.045833 E  | KX133029-KX133031  |
| <i>Kalidium cuspidatum</i> var.<br><i>cuspidatum</i> | 37.344167 N 104.084722 E | KX133032-KX133034  |
| <i>Kalidium cuspidatum</i> var.<br><i>cuspidatum</i> | 37.669722N 107.515556 E  | KX133035-KX133037  |
| <i>Kalidium cuspidatum</i> var.<br><i>cuspidatum</i> | 38.869722 N 106.756389 E | KX133038-KX133040  |
| <i>Kalidium cuspidatum</i> var.<br><i>cuspidatum</i> | 38.872778 N 108.698333 E | KX133041-KX133043  |
| <i>Kalidium cuspidatum</i> var.<br><i>sinicum</i>    | 36.025278 N 97.647500 E  | KX133044-KX133046  |
| <i>Kalidium cuspidatum</i> var.<br><i>sinicum</i>    | 36.463333 N 103.932778 E | KX133047-KX133049  |
| <i>Kalidium cuspidatum</i> var.<br><i>sinicum</i>    | 38.308889 N 103.275556 E | KX133050-KX133052  |
| <i>Kalidium cuspidatum</i> var.<br><i>sinicum</i>    | 35.851389 N 94.520833 E  | KX133053-KX133055  |
| <i>Kalidium cuspidatum</i> var.<br><i>sinicum</i>    | 39.128889 N 100.551111 E | KX133056-KX133058  |
| <i>Kalidium foliatum</i>                             | 39.916111 N 105.705000 E | KX133059-KX133061  |
| <i>Kalidium foliatum</i>                             | 38.308889 N 103.275556 E | KX133062-KX133064  |
| <i>Kalidium foliatum</i>                             | 43.772500 N 91.721667 E  | KX133065-KX133067  |
| <i>Kalidium foliatum</i>                             | 44.642778 N 83.252778 E  | KX133068-KX133070  |
| <i>Kalidium foliatum</i>                             | 44.642778 N 85.268611 E  | KX133071-KX133073  |
| <i>Kalidium foliatum</i>                             | 44.023813 N 113.898182 E | AY489238           |
| <i>Kalidium foliatum</i>                             | 47.612650 N 84.954706 E  | DQ340150           |
| <i>Kalidium foliatum</i>                             | 46.658874 N 47.805919 E  | KU975201           |
| <i>Kalidium foliatum</i>                             | 47.358223 N 47.358223 E  | KU975200           |
| <i>Kalidium foliatum</i>                             | 47.189457 N 50.765061 E  | AY181874           |
| <i>Kalidium foliatum</i>                             | 47.650950 N 87.775569 E  | HM131638           |
| <i>Kalidium gracile</i>                              | 43.635000 N 91.957778 E  | KX133074-KX133076  |
| <i>Kalidium gracile</i>                              | 38.853056 N 106.756389 E | KX133077-KX133079  |
| <i>Kalidium gracile</i>                              | 39.155278 N 98.170556 E  | KX133080-KX133082  |
| <i>Kalidium gracile</i>                              | 40.845278 N 103.609167 E | KX133083-KX133085  |
| <i>Kalidium gracile</i>                              | 36.449167 N 103.984167 E | KX133086-KX133088  |
| <i>Kalidium gracile</i>                              | 44.755554 N 100.826111 E | DQ340151           |
| <i>Kalidium schrenkianum</i>                         | 41.925556 N 82.854167 E  | KX133089-KX133091  |
| <i>Kalidium schrenkianum</i>                         | 42.113056 N 83.146667 E  | KX133092-KX133094  |
| <i>Kalidium schrenkianum</i>                         | 41.590556 N 81.335556 E  | KX133095-KX133098  |
| <i>Kalidium schrenkianum</i>                         | 45.833052 N 62.202842 E  | KU975203           |

|                            |                         |          |
|----------------------------|-------------------------|----------|
| <i>Kalidium wagenitzii</i> | 38.366888 N 33.564323 E | DQ340146 |
|----------------------------|-------------------------|----------|

Note - the sample coordinates were taken from the articles

### Supplement C

Matrix of SCoT primer results: SCoT 11 – 1-15; SCoT 12 – 16-33; SCoT 13 – 34-48; SCoT 14 – 49-64; SCoT 21 – 65-91; SCoT 23 – 92-109

#### B01.1\_K\_caspicum

10010001001100010001011000111001011001110010000001101001010000000010100101000000001001001  
11100001101101000000

#### B01.2\_K\_caspicum

1001000100110001000101000011000001000111000000000111000101010000000000100000000001001001  
10100001101000000000

#### B01.3\_K\_caspicum

10010001001100010001010000110000011001110000000001110001010100100000000100000000001001000  
00100001101000000010

#### B02.1\_K\_foliatum

0011000000110101000100000011011001100100001000110111101010110100000000111000010000000011  
01000000111000000010

#### B02.2\_K\_foliatum

00010000001100010001000000110000011011000000000101100001010000100000000111000010000000011  
01000000111000000000

#### B02.3\_K\_foliatum

00010000001100010001000000110000011011000000000101110001010000100001000111000010000000011  
01000000111000000000

#### B03.1\_K\_caspicum

01101001001100010011000000111001011001111000100001110001010000001010100101000110001000001  
11100101001010100101

#### B03.2\_K\_caspicum

01001001001100010001010001110000011001111000100001111101000100001010000101001101001000000  
00100001001000100111

#### B03.3\_K\_caspicum

01001001001100010001111001110000011001111001100001111001000100001010000101001101001000000  
00100001001000100111

#### B04.1\_K\_caspicum

10010001001100011001010010110001011001001100100001111101010100000010001101000000000001100  
11011000011000000010

#### B04.2\_K\_caspicum

10010001001100011001110100110000011001001011000001111001000100000010000101000010000001000  
10000000111000000000

#### B04.3\_K\_caspicum

10010001001100011001011010110001011001001100100001110001000100000010001101000000000001100  
11000100001110000010

#### B05.1\_K\_foliatum

00010000001100010011000000110000011101001000010001111100101101001100000101001010000000001  
10000000010110000010

#### B05.2\_K\_foliatum

00010000001100010001000000110000111001001000100001111101000100001100010101001010000000001  
10000000010100000010

#### B05.3\_K\_foliatum

00011000001110100001000000110000011001000000000001100001010000101000000001000001000010001  
00000000011100000010

#### B06.1\_K\_foliatum

100110000011101100010010001101000110110000000001011101010001100000000001101000100000000011  
01100001001100001010

#### B06.2\_K\_foliatum

10011000001110111001100001110100011011000000000100100001010000000100000110100010011000011  
01100001001101010010

B06.3\_K\_foliatum

10010000001100010101100001110100011011010000000101111101000110000100000110100010011000001  
01100001001100001011

B07.1\_K\_caspicum

11000001001100010001011001111001011001011011100001111101100100000010100101000000000101000  
01100001001100100111

B07.2\_K\_caspicum

11000001001100010001011001111001011001011011100001111101100100000010100101000000000101000  
01100001001100100111

B07.3\_K\_caspicum

11000001001100010001011001111001011001011011100001111101100100000010100101000000000101000  
01100001001100100111

B08.1\_K\_caspicum

110100010011000111111010111110010110011110101000011111101010000001010010100000000001000  
11100001011100000011

B08.2\_K\_caspicum

110100010011000111111010111110010110011110101000011111101010000001010010000000000001000  
11100001011100000011

B08.3\_K\_caspicum

11010001001100011011101010111001011001111010111001111111010100000010100101000000000001000  
11100001011100000011

B09.1\_K\_caspicum

11010001001100000001000010110000011001001000100001111111010100000010100100000000000001100  
11000001101000000010

B09.2\_K\_caspicum

11010001001100010011001010111000011001001000100001111111010100000010100101000000000001101  
10000001001000000010

B09.3\_K\_caspicum

11010001000100010011001010110000011001001010100001111111010100000010100101000000000001100  
11000001101000000010

B10.1\_K\_caspicum

11010001001100000001000000110000011001001010100001111111101000000101001010000000000001100  
11100001011100000010

B10.2\_K\_caspicum

00010011001100110011001000110000011001001000100001110101010100101010100101001010000001001  
00000110101000000000

B10.3\_K\_caspicum

10010001000100010011011000110000011001001000100001110001000100100010100100001010000001001  
11100001111000000010

B11.1\_K\_caspicum

01010001000100010011000000110000011001001000100001111111101000000101001010000000000001000  
11000010111000000000

B11.2\_K\_caspicum

00000001001100110001000000110000011001001000100001110001110000100010100101010011000001000  
11000100001010000000

B11.3\_K\_caspicum

00000001001100110001000000110000011001001000100001110101110100100010100100000010000001000  
11000000001000000000

B12.1\_K\_caspicum

10010001000110100001000000110000010001000000000001110001010000100010100101000000000001000  
10000000001000000000

B12.2\_K\_caspicum

00000100000100010001011000110000011001001000000001111111010100000010100100000010000001000  
10000000011000000000

B12.3\_K\_caspicum

100001010001000100011111100110001011001011000000001111111010100000010100101000010000001000  
10100001010100000010

B13.1\_K\_foliatum

0011100000110011000110100011010001101100000000000111101010110000100000010101010001000010  
00000001001100000010  
B13.2\_ *K\_foliatum*  
00010000001100000001000000010000011001000000000011101101010000000100000011001010001000010  
00000000001000000000  
B13.3\_ *K\_foliatum*  
0001100000110011000100100011010001100100100000000111101010110000100000010101010001000001  
00000010001000000000  
B14.1\_ *K\_caspicum*  
1011100101000011100101110011000001100111100000000111101010100000010100101000000000001000  
10100001000100000010  
B14.2\_ *K\_caspicum*  
0001000010110001100100100011000001100100100111000111101010100001110010101000000010001000  
00100001000100000000  
B14.3\_ *K\_caspicum*  
1011100010010001100101000011000001100100100000000111101010100000000100101000000001001000  
00100001000100000000  
B15.1\_ *K\_schrenkianum*  
10011000101101010001010000110000011001001100000001100001010000011101000101000010011000100  
00000000001001000000  
B15.2\_ *K\_schrenkianum*  
10011000101100010001100000111000011001000100000001100001010000011101000101000010111000100  
00000001001001000000  
B15.3\_ *K\_schrenkianum*  
10011000101100011001010000110000011001001100000001100001000000011101000100100010011000100  
00000000001101000000

**Supplement D.** Interspecific location of the three species in the PCA (SPSS): A – Components 1 and 2;  
B – Components 1 and 3; C – Components 2 and 3

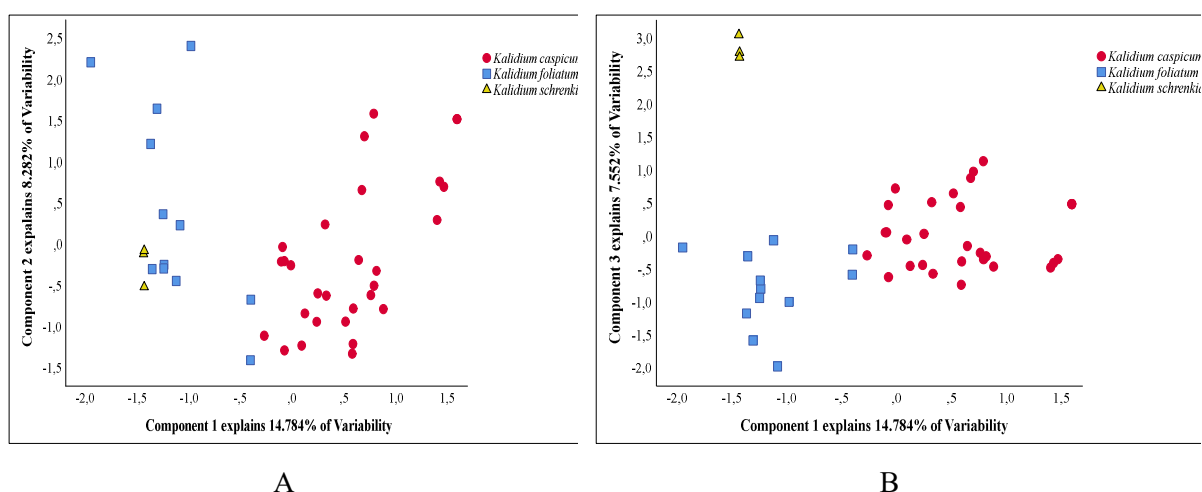

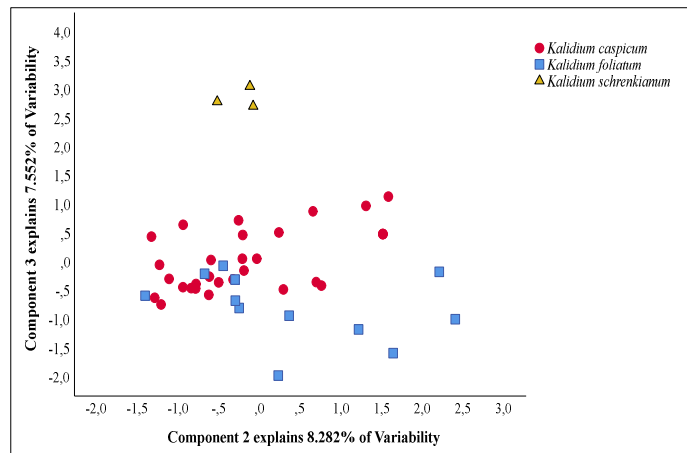

C

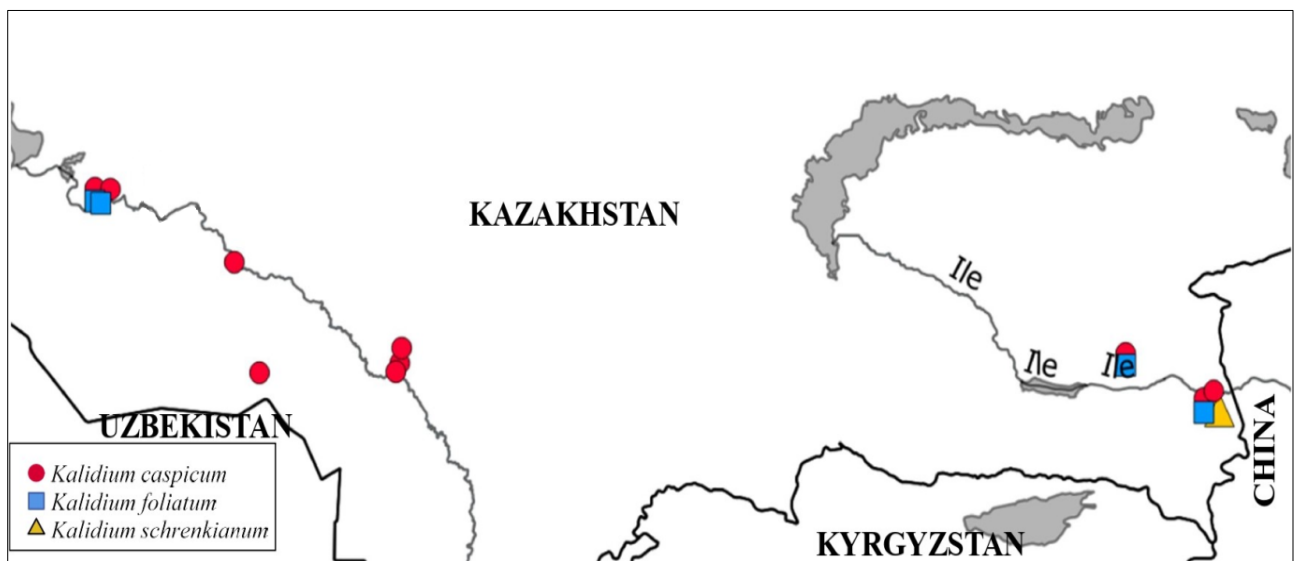

Map of the geographical distribution of the three species of the genus *Kalidium*

**Supplement E.** Intraspecific location of *Kalidium caspicum* populations in the histogram (SPSS): A – Components 1 and 2; B – Components 1 and 3; C – Components 2 and 3

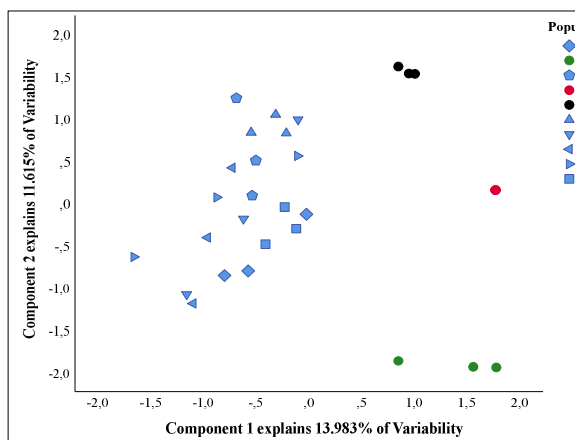

A

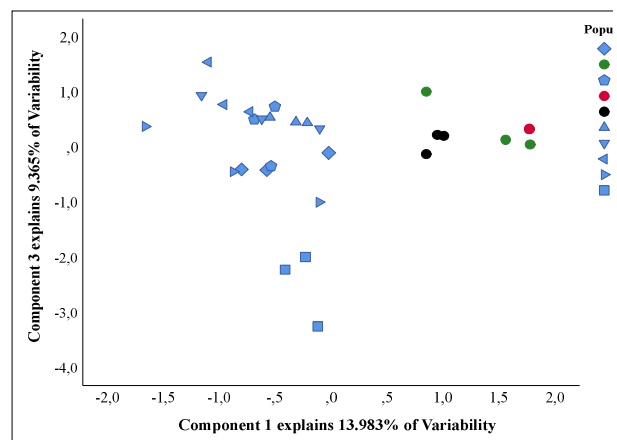

B

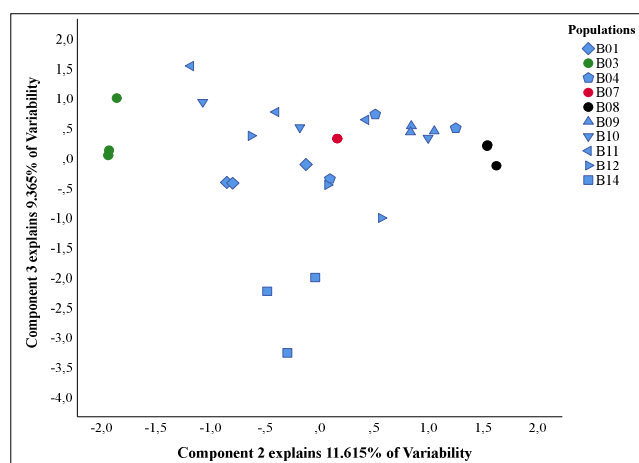

C

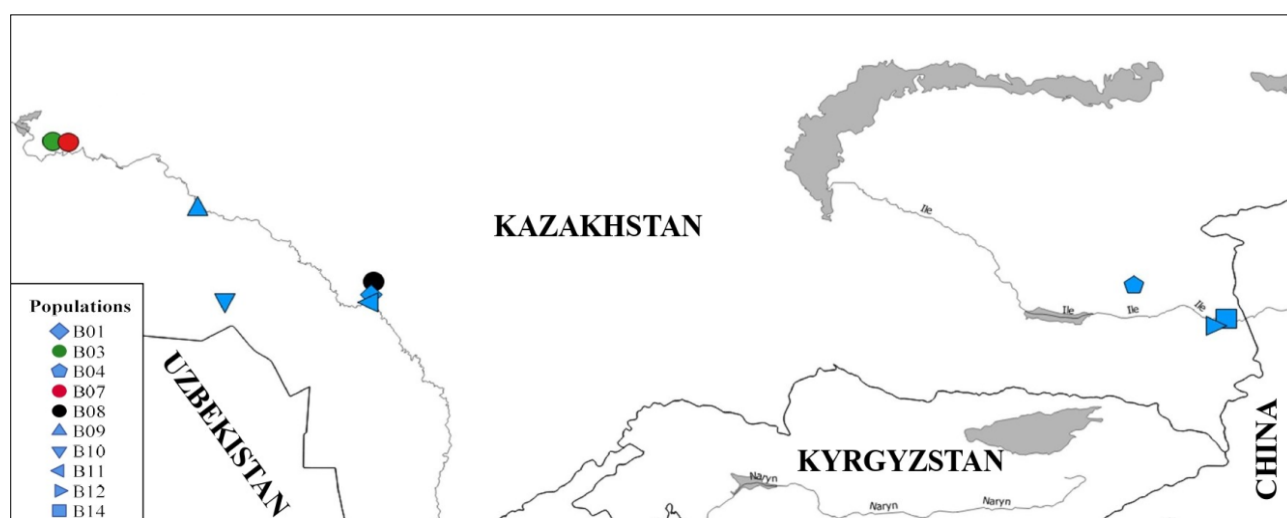

Map of the geographical location of *Kalidium caspicum* populations

**Supplement F.** Intraspecific location of *Kalidium foliatum* populations in the histogram (SPSS): A – Components 1 and 2; B – Components 1 and 3; C – Components 2 and 3

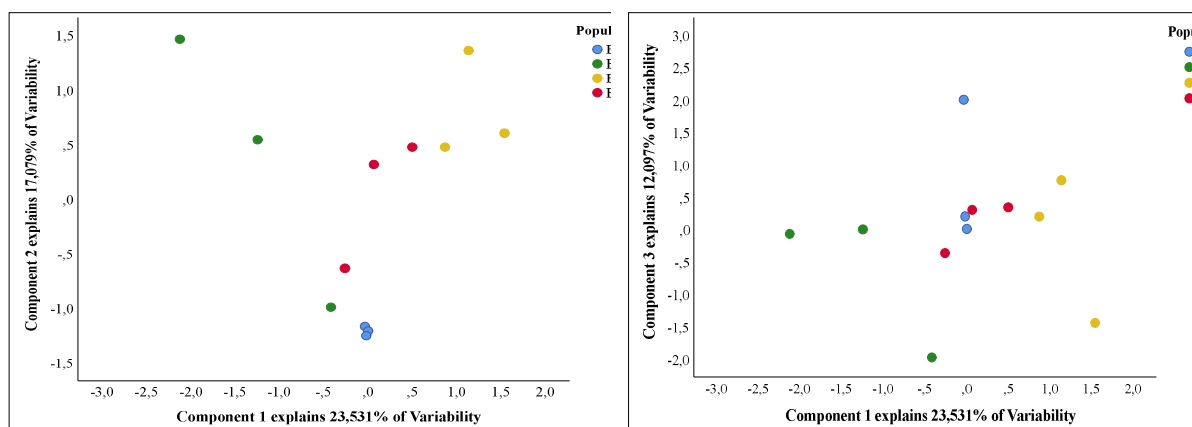

**A****B**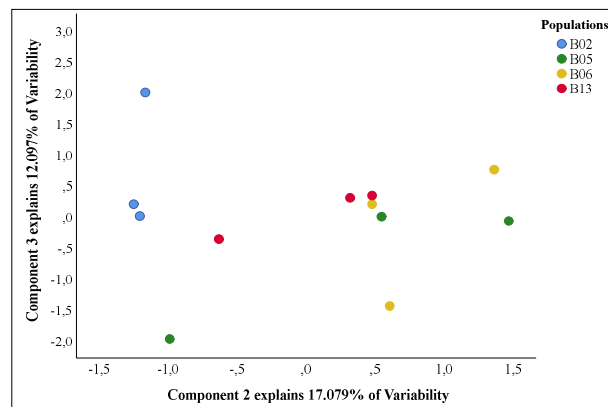**C**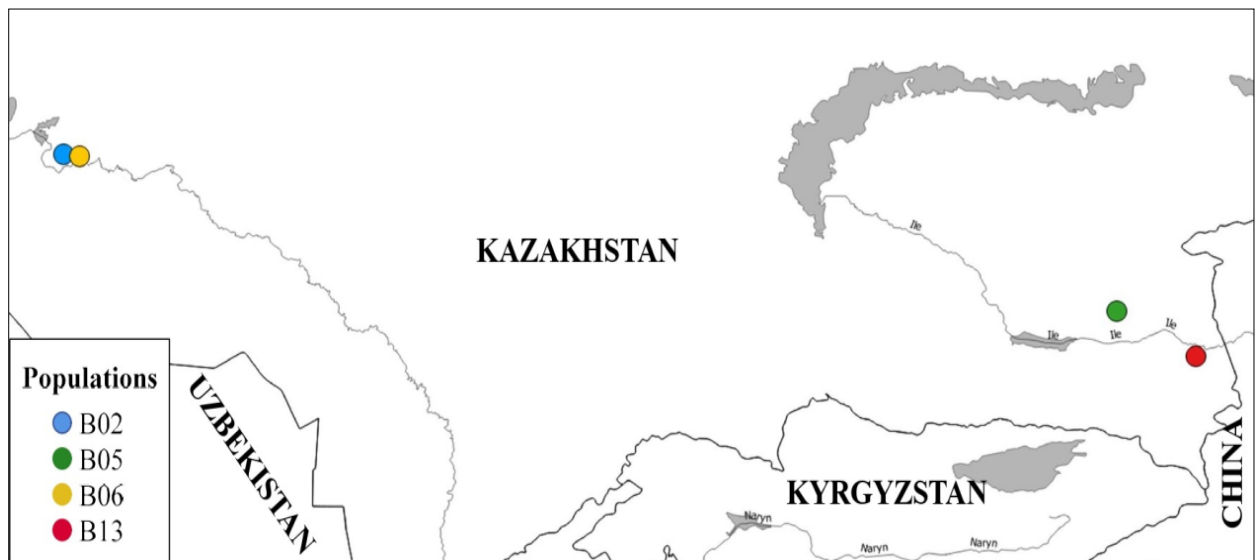

Map of the geographical location of *Kalidium foliatum* populations
